# Supplementary material
Source: publisher figshare collection journal article supplement (https://acs.figshare.com/ndownloader/files/4594111)
Supplement: Supplementary file 1 [file 4594111]

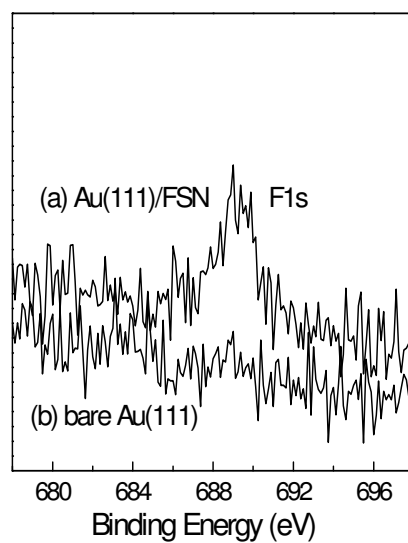

Figure S1. XPS spectra of the F1s features for (a) FSN SAMs on Au(111), and (b) bare Au(111).

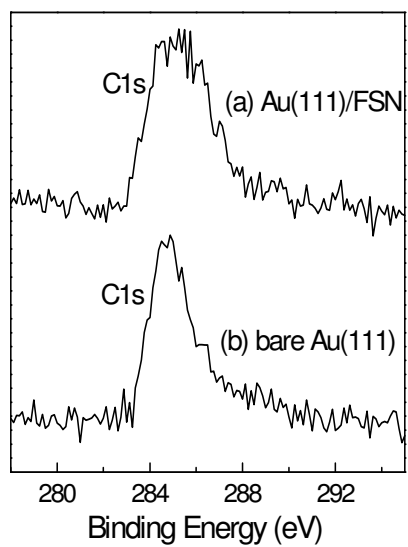

Figure S2. XPS spectra of the C1s features for (a) FSN SAMs on Au(111), and (b) bare Au(111).

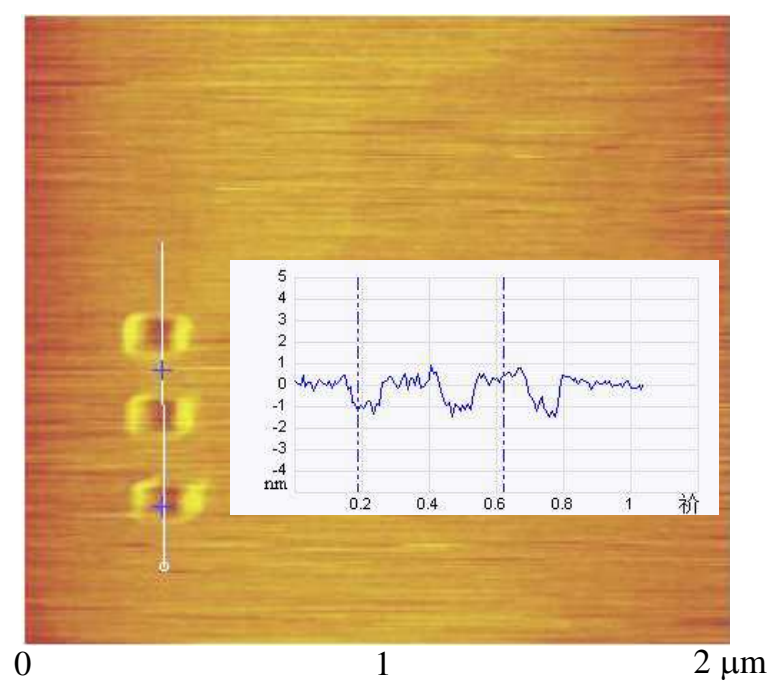

Figure S3. AFM image of FSN SAMs on Au(111) after a part of FSN molecules were removed. Scan size: 2 μm × 2 μm. Inset: sectional analysis of the three pits for characterizing the thickness of FSN SAMs.
